# Supplementary material
Source: PubMed Central journal article supplement (PMC5649125)
Supplement: Supp_Fig1.pdf [file Supp_Fig1.pdf]

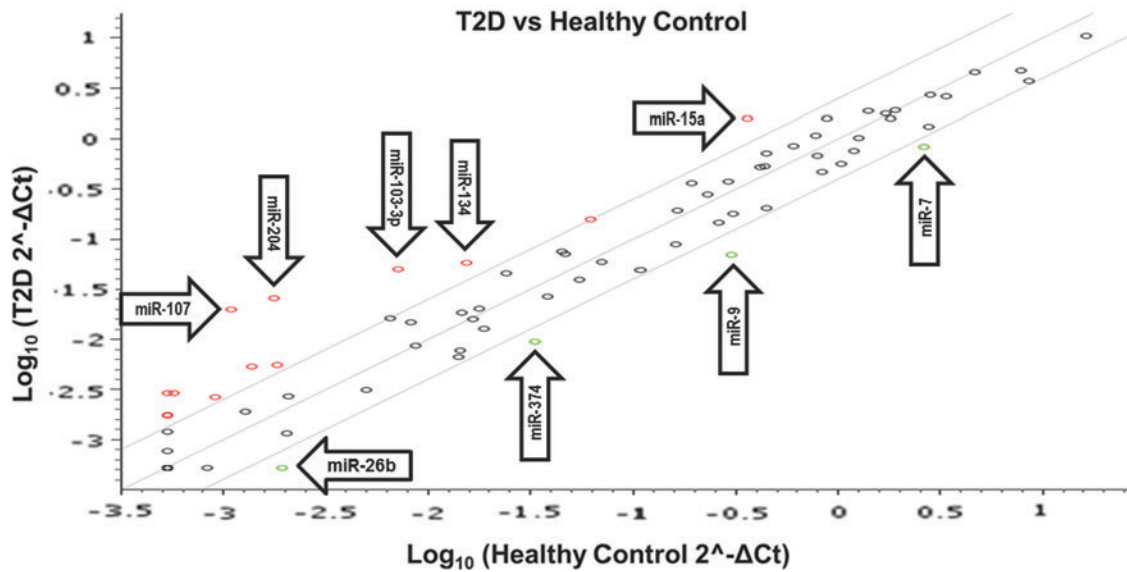

**SUPPLEMENTARY FIG. S1. Strategy of global profiling of circulating miRNAs in T2D conditions.** Scatter Plot representation of the miRNA microarray analysis in healthy volunteers (Control,  $n=3$ ) and T2D patients without any complications (T2D,  $n=3$ ). For healthy volunteers, each sample is a pool of two independent subjects, and for the T2D group, samples 1 and 2 are pools of 3 independent patients, and sample 3 is a pool of two patient samples. The  $\log_{10}$  expression of each gene is mean centered based on all the data from that gene. *Red dots* indicate the miRNAs, which are significantly higher, whereas *green dots* are the miRNAs, which are less abundant in T2D patients' plasma compared with healthy controls. Using a 20% false discovery rate as a filter, we have identified 12 miRNAs, which have a threefold or more increased expression, and 6 miRNAs, which have decreased expression by at least 2.5-fold in the serum samples from diabetic patients. miRNA, microRNA; T2D, type 2 diabetes.
