# Supplementary material
Source: PubMed Central journal article supplement (PMC5649125)
Supplement: Supp_Fig3.pdf [file Supp_Fig3.pdf]

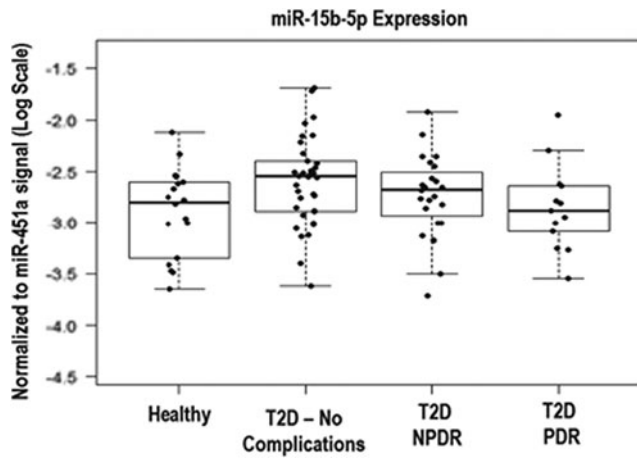

**SUPPLEMENTARY FIG. S3.** There is no statistically significant difference in the level of miR-15b in the blood across the four groups, (i) normal (Healthy) control, (ii) T2D patients without any complications, (iii) T2D patients with NPDR, and (iv) T2D patients with PDR.
