# Supplementary material
Source: PubMed Central journal article supplement (PMC5649125)
Supplement: Supp_Fig4.pdf [file Supp_Fig4.pdf]

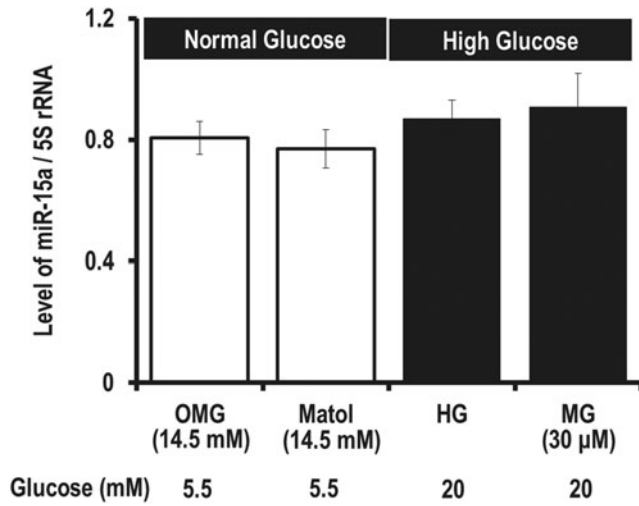

**SUPPLEMENTARY FIG. S4.** rMC-1 cells exposed to HG media mimicking T2D condition and prolonged T2D condition by the AGE, MG did not show any significant change in the expression of miR-15a along with glucose osmotic controls, mannitol (matol) and OMG. AGE, advanced glycation end product; HG, high glucose; MG, methyl glyoxylate; OMG, O-methyl glucose.
