# Supplementary material
Source: PubMed Central journal article supplement (PMC5649125)
Supplement: Supp_Fig6.pdf [file Supp_Fig6.pdf]

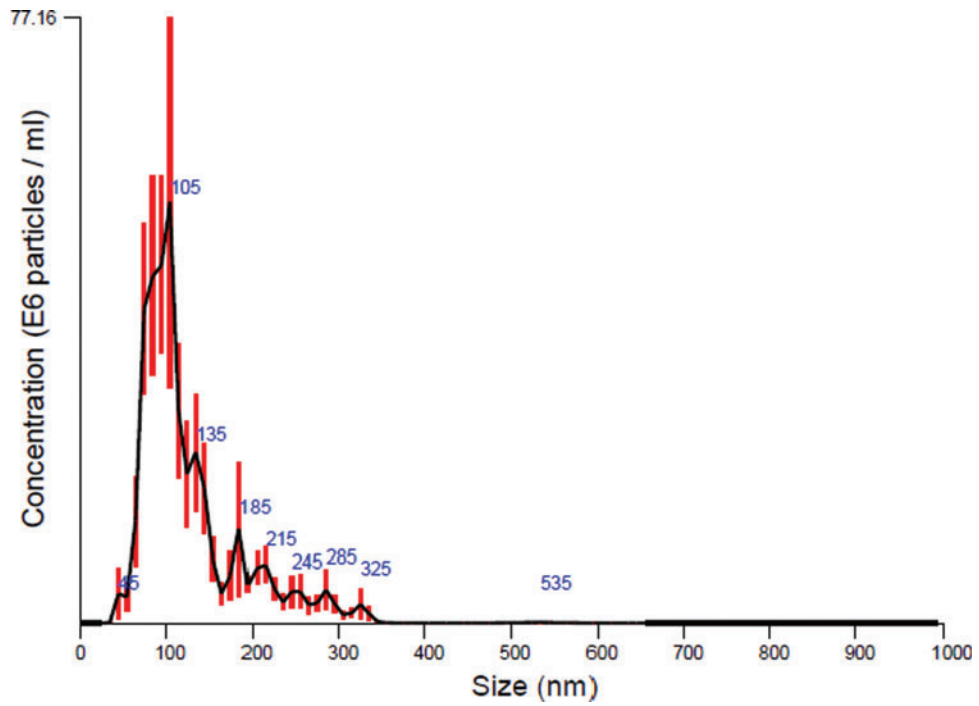

**SUPPLEMENTARY FIG. S6. Nanotracking analysis of mouse serum samples.** NTA revealed that the average size of the exosomes released from mouse serum samples was  $122.1 + 60.6$  nm, and the concentration was  $3.71 \times 10^{11} \pm 2.08 \times 10^7$  particles/mL.
