# Supplementary material
Source: PubMed Central journal article supplement (PMC5649125)
Supplement: Supp_Table1.pdf [file Supp_Table1.pdf]

## Supplementary Data

SUPPLEMENTARY TABLE S1. LIST OF EVALUATED  
MICRORNAs ON THE FIREFLY PLATFORM

---

|             |            |
|-------------|------------|
| miR-1       |            |
| miR-103a-3p | RBC        |
| miR-107     | miR-451a   |
| miR-122-5p  | miR-486-5p |
| miR-126-3p  |            |
| miR-128     |            |
| miR-130b-3p |            |
| miR-133a    |            |
| miR-134     |            |
| miR-143-3p  |            |
| miR-146a-5p | WBC        |
| miR-15a-5p  | miR-150    |
| miR-15b-5p  |            |
| miR-181a    |            |
| miR-191-5p  |            |
| miR-197-3p  |            |
| miR-19a-3p  |            |
| miR-204-5p  |            |
| miR-20b-5p  |            |
| miR-210     |            |
| miR-21-5p   |            |
| miR-221-3p  |            |
| miR-223-3p  |            |
| miR-22-3p   |            |
| miR-24-3p   |            |
| miR-26b-5p  |            |
| miR-28-3p   |            |
| miR-29b-3p  |            |
| miR-320a    |            |
| miR-326     |            |
| miR-34a-5p  |            |
| miR-374a-5p |            |
| miR-7-5p    |            |
| miR-885-5p  |            |
| miR-9-5p    |            |

---

We combined miRNAs found to be significantly altered in our qPCR microarray data (Fig. 1A) with miRNAs from five publications on potential T2D circulating miRNA biomarkers. Additionally, RBC miRNA markers, miR-451a and miR-486, and the WBC miRNA miR-150 were included as potential normalizers of the data. We wanted to validate these 38 miRNAs using Firefly platform.

miRNA, microRNA; qPCR, quantitative PCR; RBC, red blood cell; T2D, type 2 diabetes; WBC, white blood cell.
