# Supplementary material
Source: PubMed Central journal article supplement (PMC5649125)
Supplement: Supplementary_Western_Data2.pdf [file Supplementary_Western_Data2.pdf]

Fig. 5B

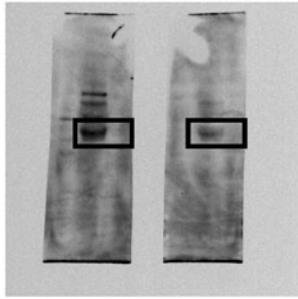

CD-81 CD-63

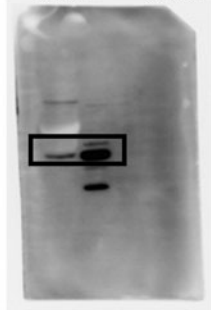

TSG101

Fig. 6C

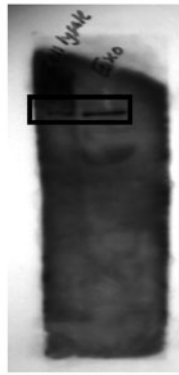

Alix

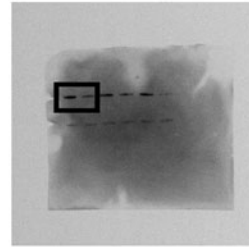

Akt3

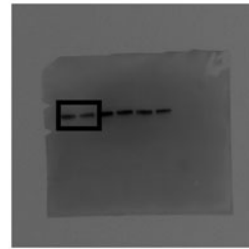

$\alpha$ -Tubulin

Fig. 6E

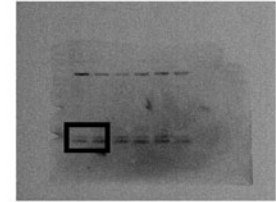

Clev Cas 3

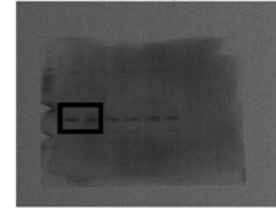

Cas 3

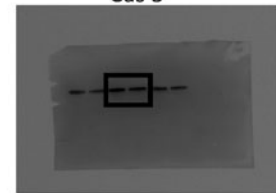

$\alpha$ -Tubulin

**SUPPLEMENTARY WESTERN DATA 2**
