# Supplementary material
Source: PubMed Central journal article supplement (PMC5649125)

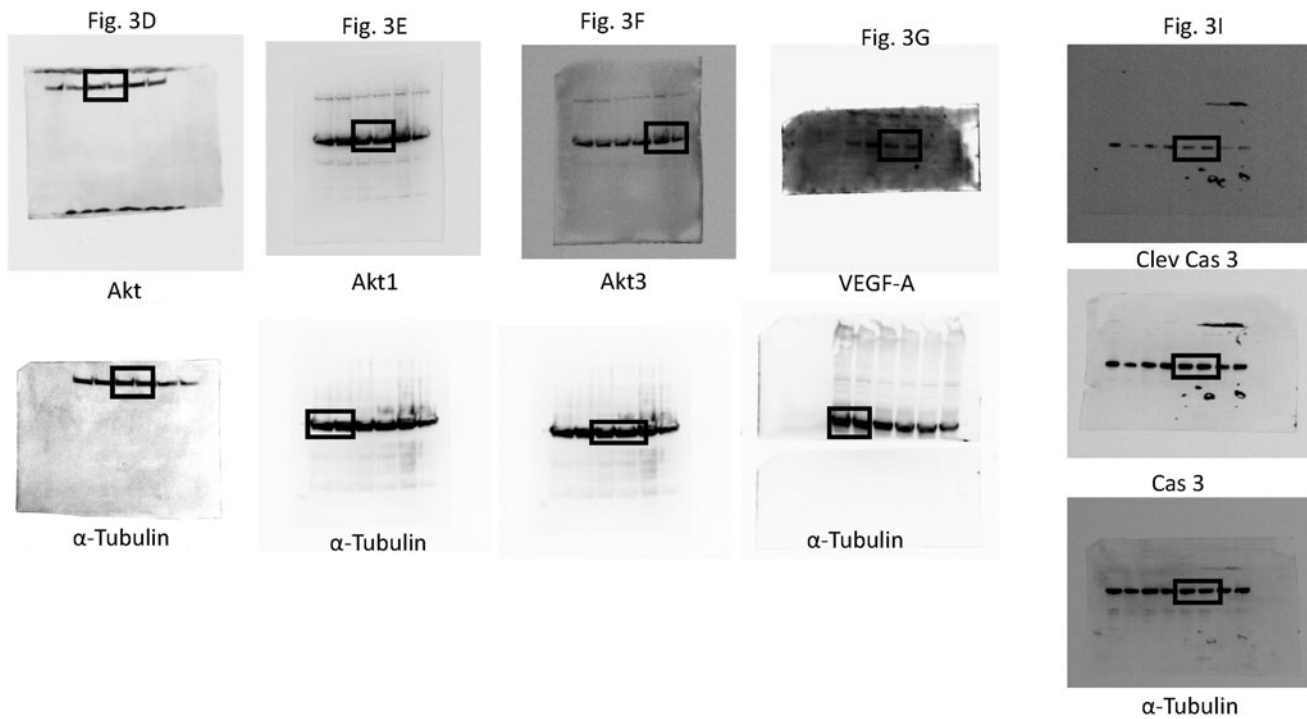

**SUPPLEMENTARY WESTERN DATA 1**

Supplement: Supplementary_Western_Data1.pdf [file Supplementary_Western_Data1.pdf]

Fig. 8D

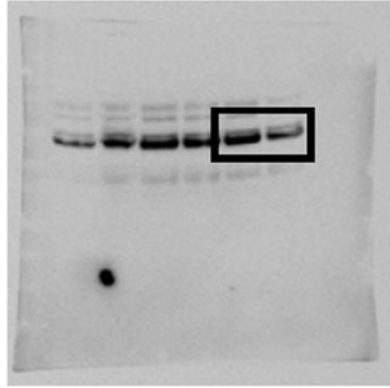

Akt3

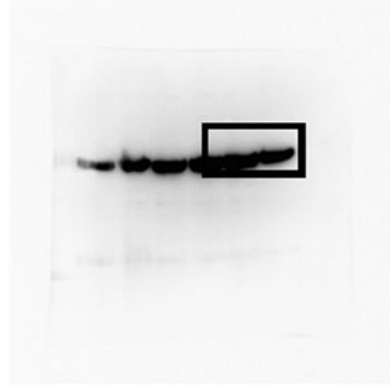

$\alpha$ -Tubulin

**SUPPLEMENTARY WESTERN DATA 3**

Supplement: Supplementary_Western_Data3.pdf [file Supplementary_Western_Data3.pdf]
